# Supplementary material for: Dissecting tumor lymphocyte infiltration to predict benefit from immune-checkpoint inhibitors in metastatic colorectal cancer: lessons from the AtezoT RIBE study
Source: HighWire-hosted journal article supplement (doi:10.1136/jitc-2022-006633), 2023-04-01
Supplement: jitc-2022-006633supp002_data_supplement.pdf [file jitc-2022-006633supp002_data_supplement.pdf]

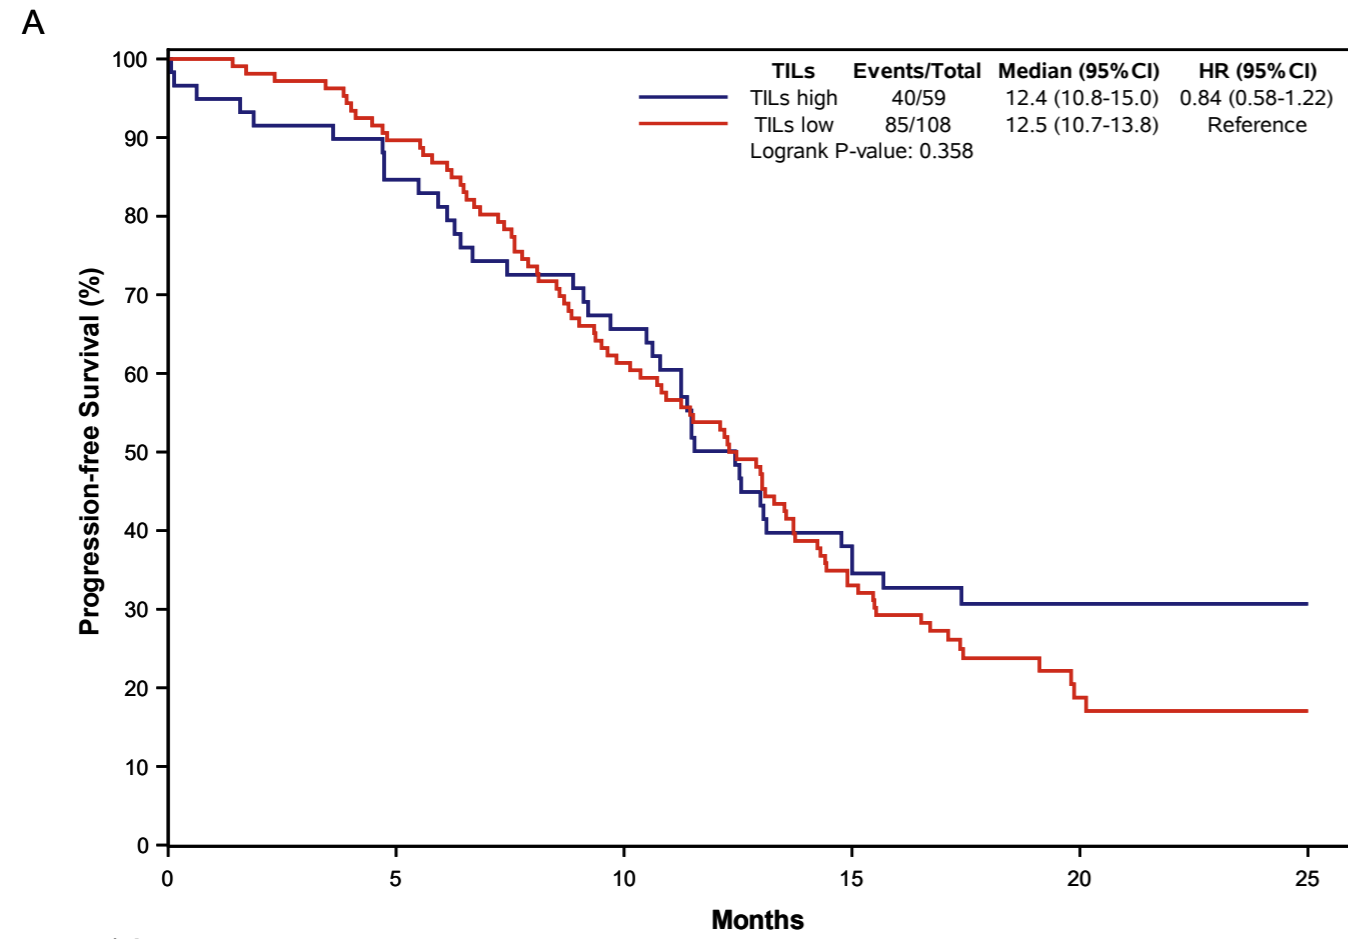

**No. at Risk**

| Months    | 0   | 5  | 10 | 15 | 20 | 25 |
|-----------|-----|----|----|----|----|----|
| TILs high | 59  | 49 | 38 | 22 | 12 | 5  |
| TILs low  | 108 | 95 | 65 | 35 | 11 | 4  |

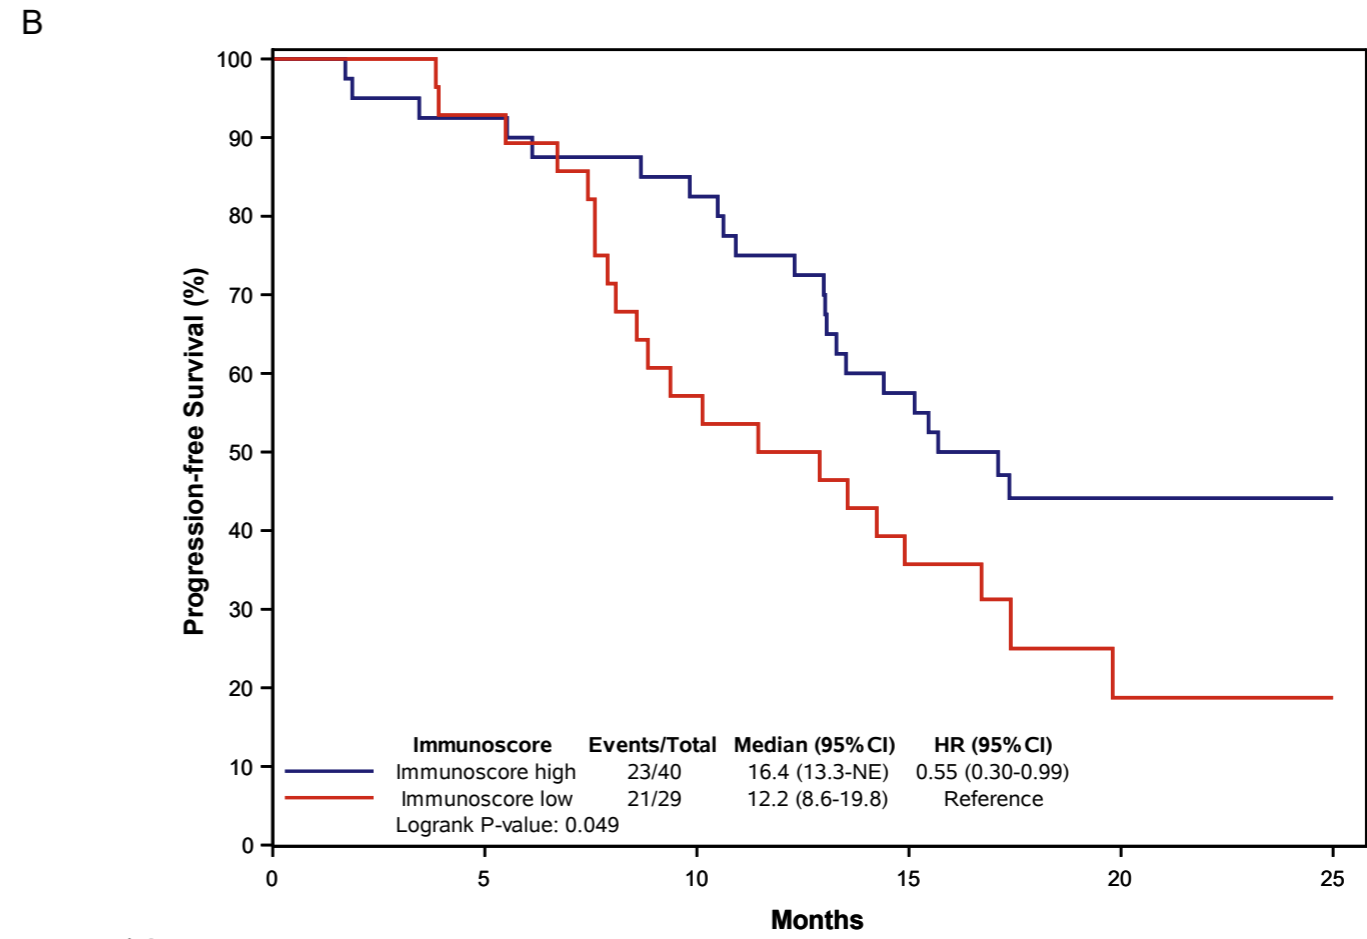

**No. at Risk**

| Months           | 0  | 5  | 10 | 15 | 20 | 25 |
|------------------|----|----|----|----|----|----|
| Immunoscore high | 40 | 37 | 33 | 23 | 8  | 4  |
| Immunoscore low  | 29 | 26 | 16 | 10 | 3  | 1  |

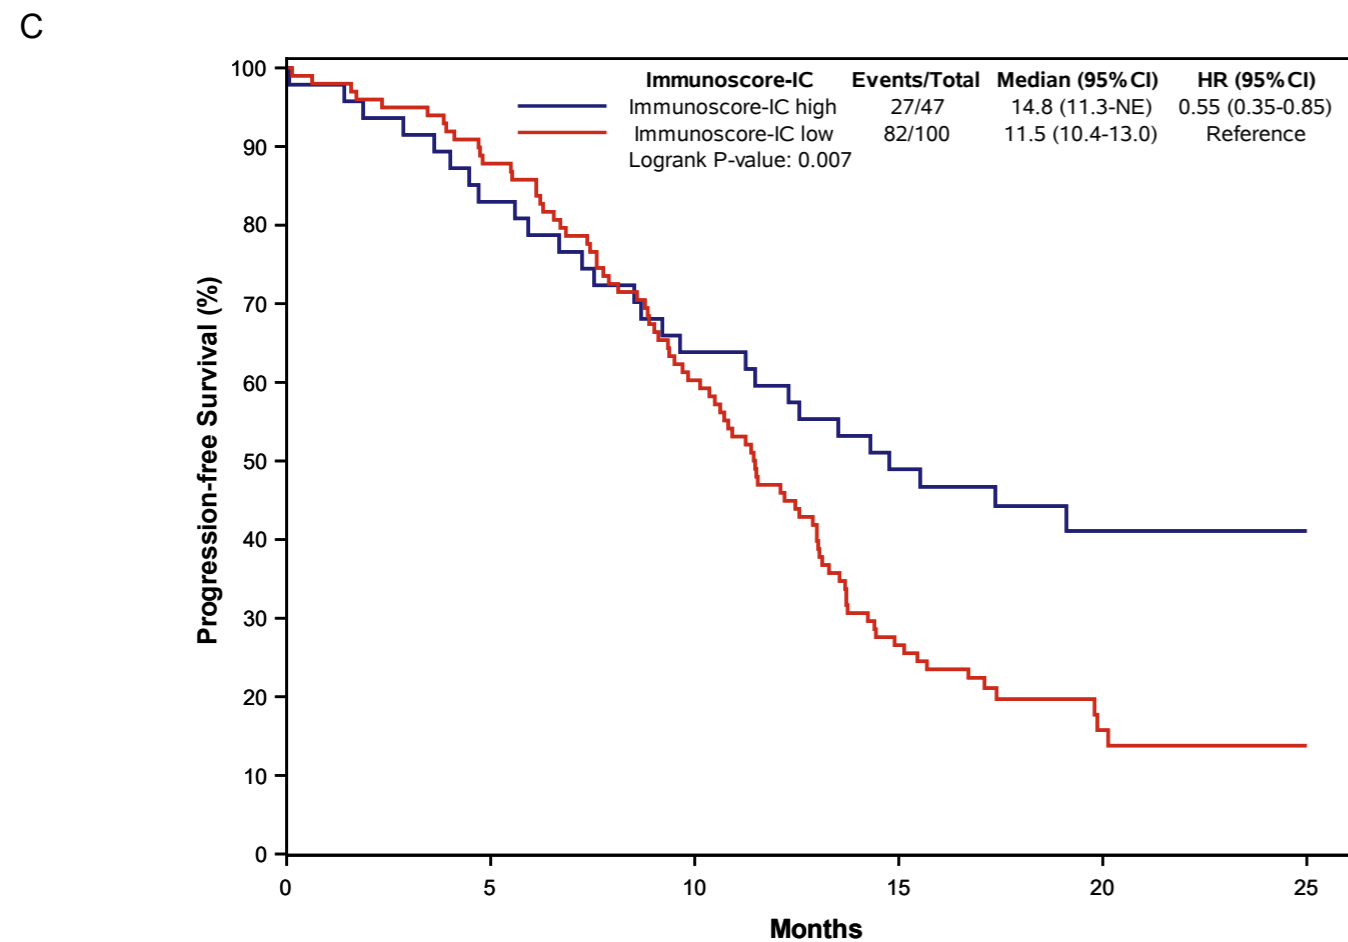

**No. at Risk**

| Months              | 0   | 5  | 10 | 15 | 20 | 25 |
|---------------------|-----|----|----|----|----|----|
| Immunoscore-IC high | 47  | 39 | 30 | 23 | 11 | 2  |
| Immunoscore-IC low  | 100 | 86 | 59 | 26 | 8  | 6  |

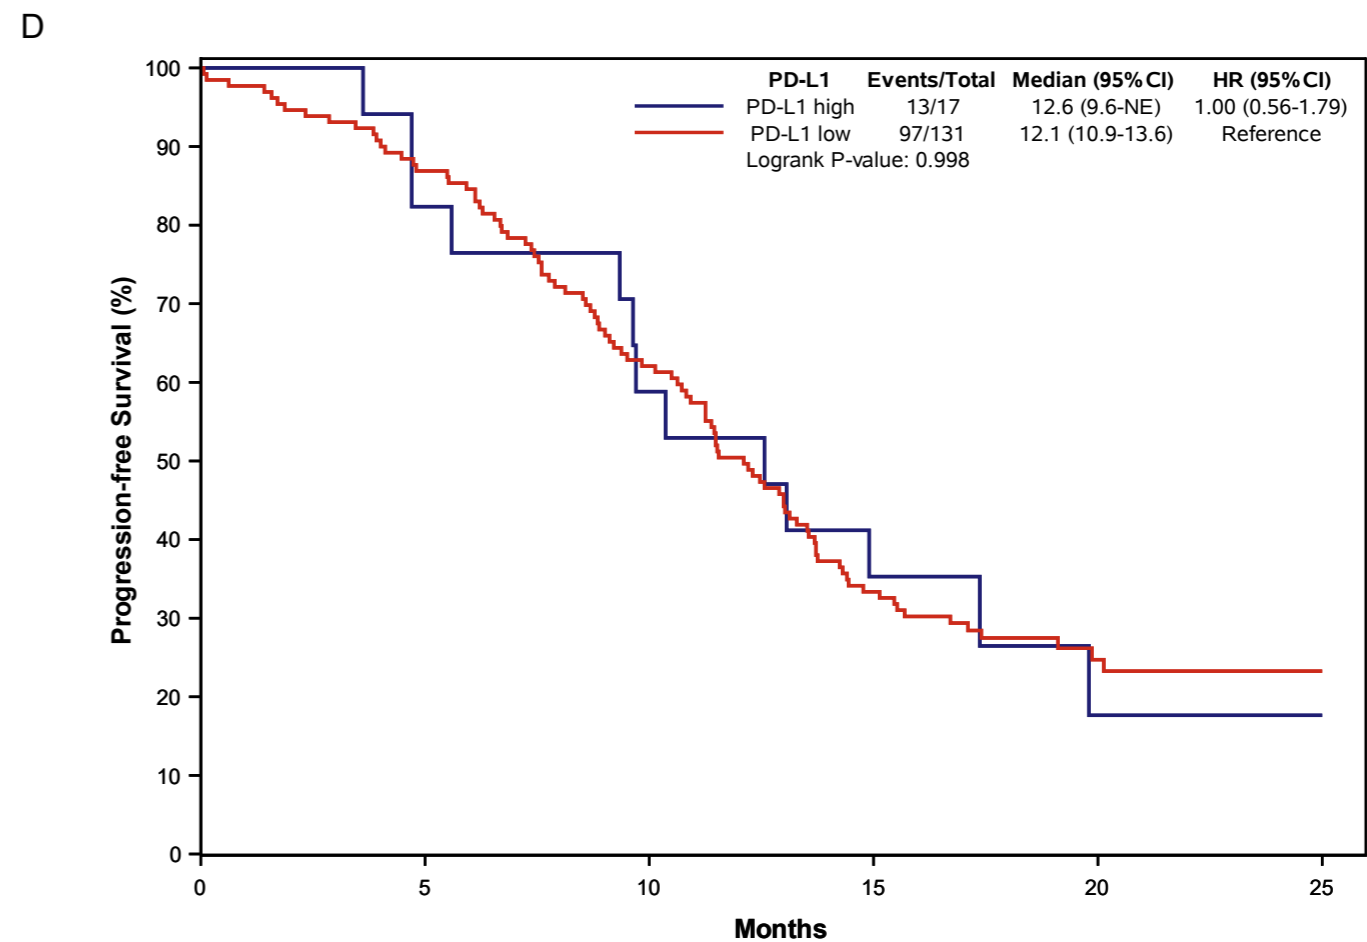

**No. at Risk**

| Months     | 0   | 5   | 10 | 15 | 20 | 25 |
|------------|-----|-----|----|----|----|----|
| PD-L1 high | 17  | 14  | 10 | 6  | 2  | 1  |
| PD-L1 low  | 131 | 112 | 80 | 43 | 17 | 7  |
