# Supplementary material for: Dissecting tumor lymphocyte infiltration to predict benefit from immune-checkpoint inhibitors in metastatic colorectal cancer: lessons from the AtezoT RIBE study
Source: HighWire-hosted journal article supplement (doi:10.1136/jitc-2022-006633), 2023-04-01
Supplement: jitc-2022-006633supp004_data_supplement.pdf [file jitc-2022-006633supp004_data_supplement.pdf]

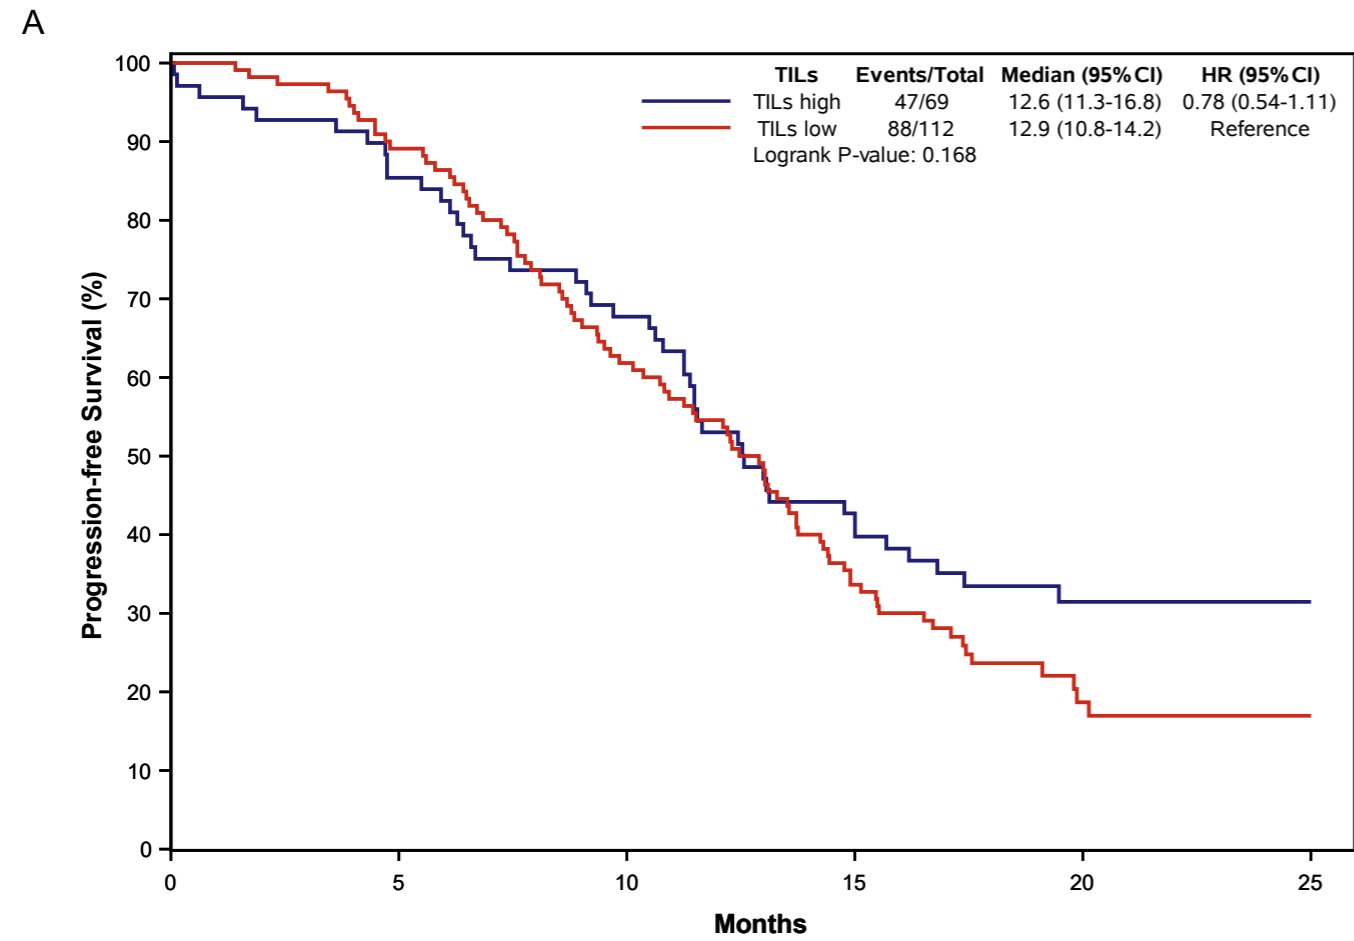

**No. at Risk**

| Months    | 0   | 5  | 10 | 15 | 20 | 25 |
|-----------|-----|----|----|----|----|----|
| TILs high | 69  | 58 | 46 | 29 | 15 | 7  |
| TILs low  | 112 | 98 | 68 | 37 | 11 | 4  |

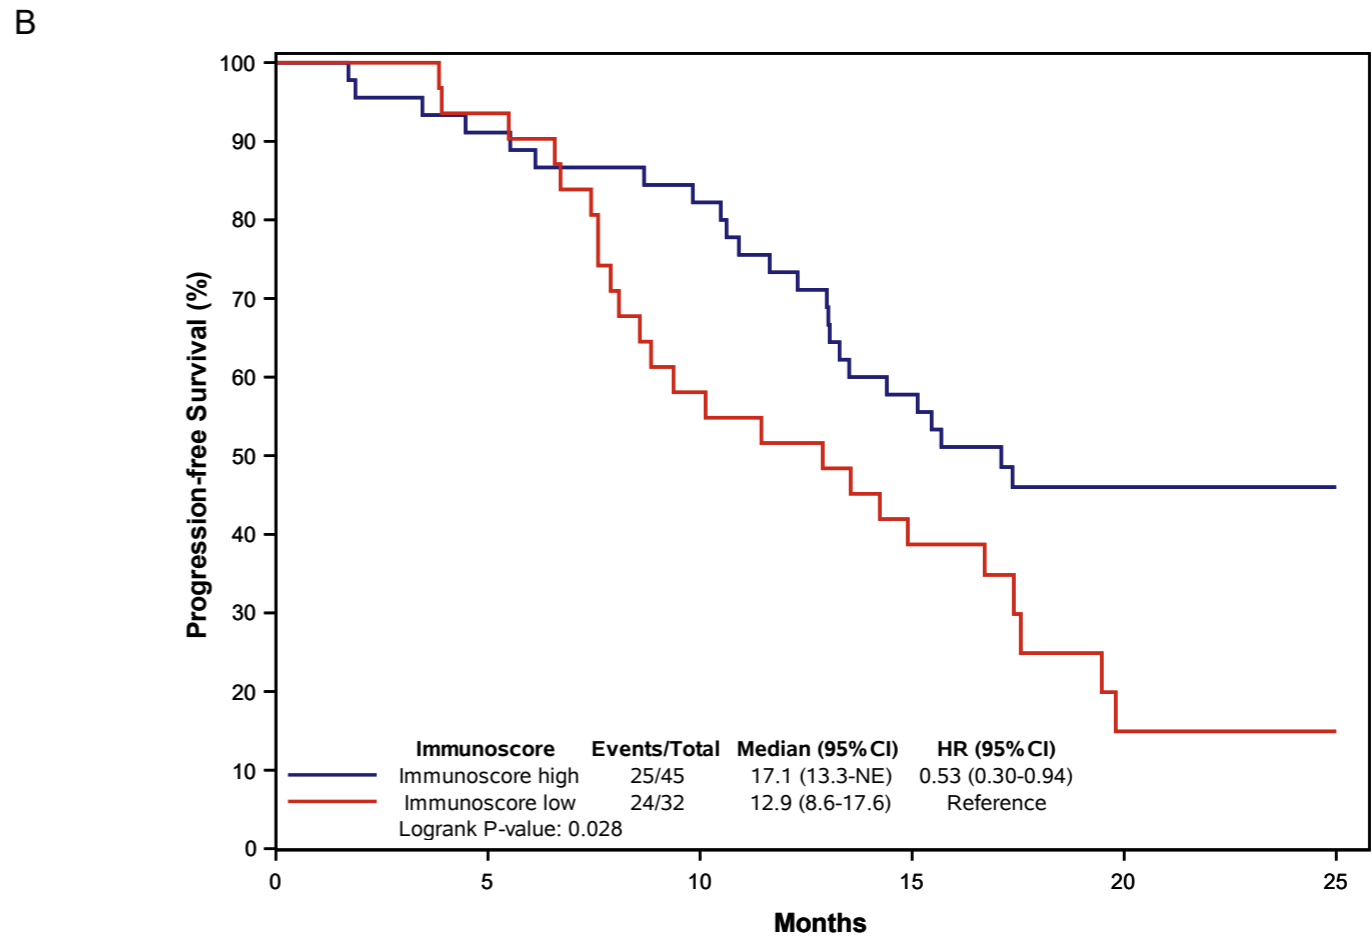

**No. at Risk**

| Months           | 0  | 5  | 10 | 15 | 20 | 25 |
|------------------|----|----|----|----|----|----|
| Immunoscore high | 45 | 41 | 37 | 26 | 9  | 5  |
| Immunoscore low  | 32 | 29 | 18 | 12 | 3  | 1  |

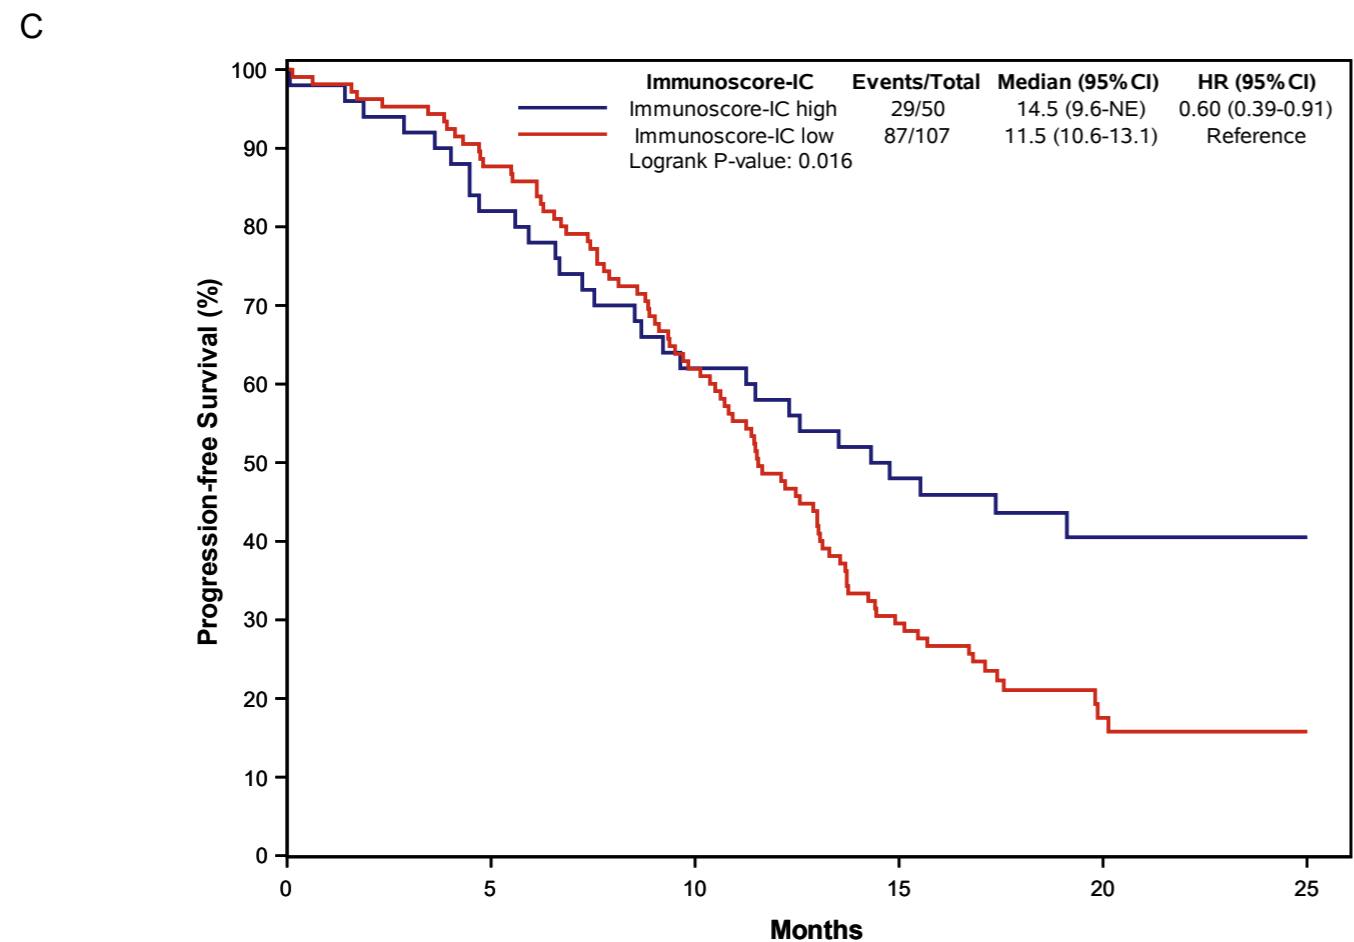

**No. at Risk**

| Months              | 0   | 5  | 10 | 15 | 20 | 25 |
|---------------------|-----|----|----|----|----|----|
| Immunoscore-IC high | 50  | 41 | 31 | 24 | 11 | 2  |
| Immunoscore-IC low  | 107 | 92 | 65 | 31 | 10 | 8  |

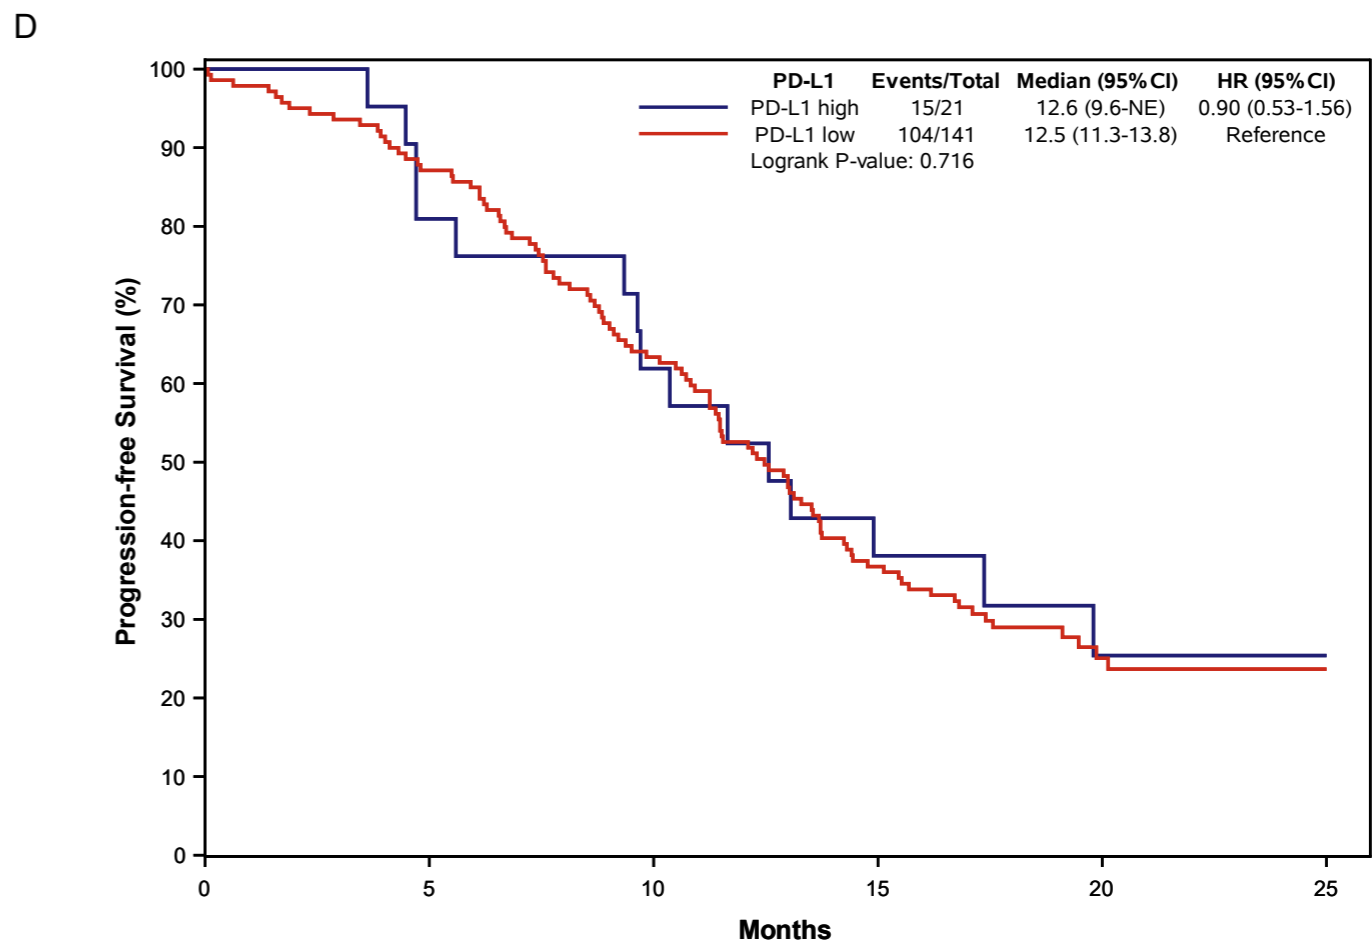

**No. at Risk**

| Months     | 0   | 5   | 10 | 15 | 20 | 25 |
|------------|-----|-----|----|----|----|----|
| PD-L1 high | 21  | 17  | 13 | 8  | 4  | 2  |
| PD-L1 low  | 141 | 121 | 88 | 51 | 18 | 8  |
