# Supplementary material for: Dissecting tumor lymphocyte infiltration to predict benefit from immune-checkpoint inhibitors in metastatic colorectal cancer: lessons from the AtezoT RIBE study
Source: HighWire-hosted journal article supplement (doi:10.1136/jitc-2022-006633), 2023-04-01
Supplement: jitc-2022-006633supp005_data_supplement.pdf [file jitc-2022-006633supp005_data_supplement.pdf]

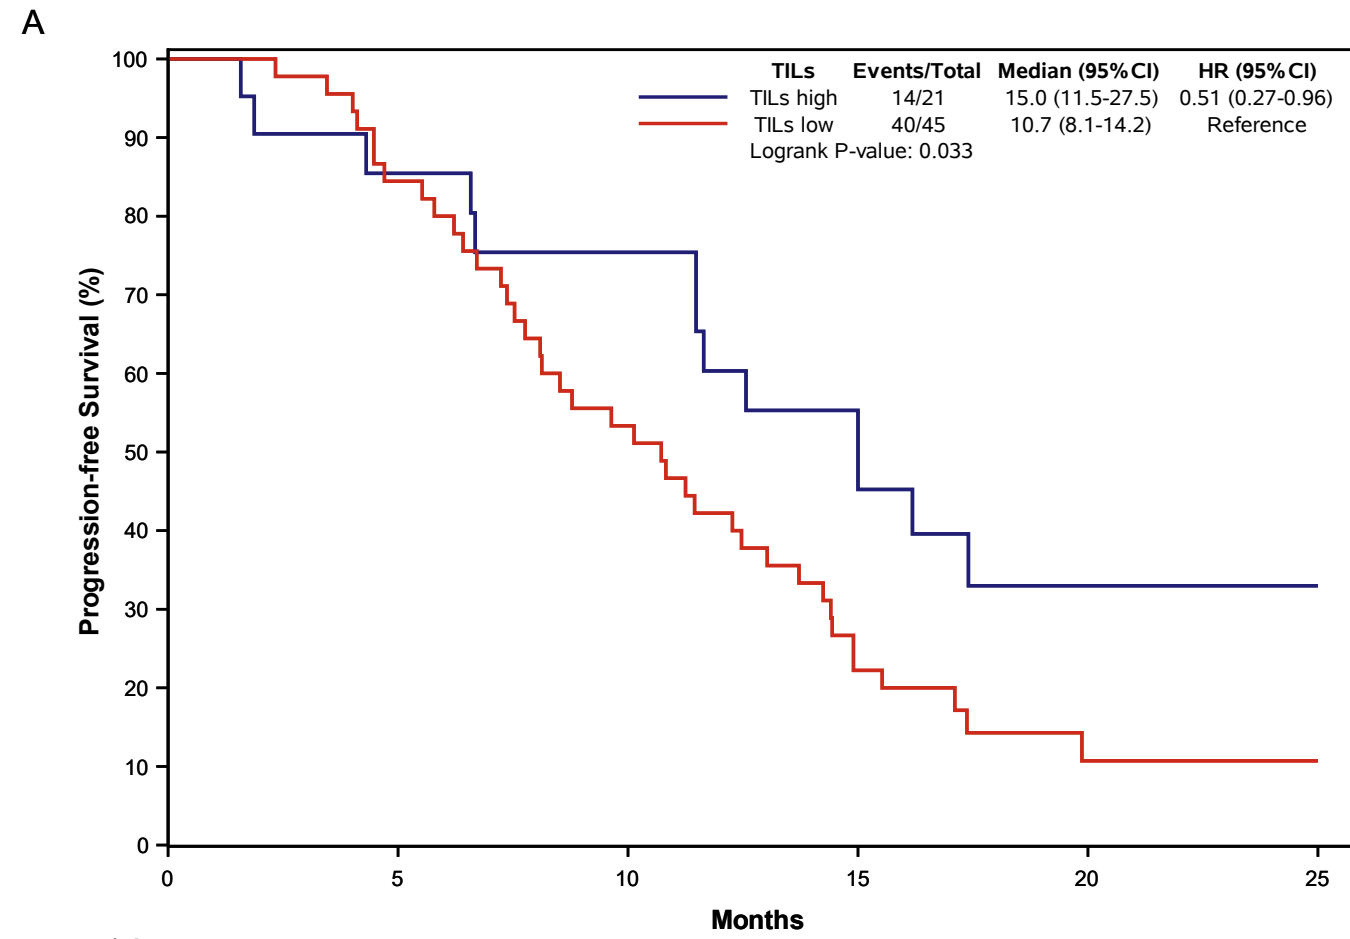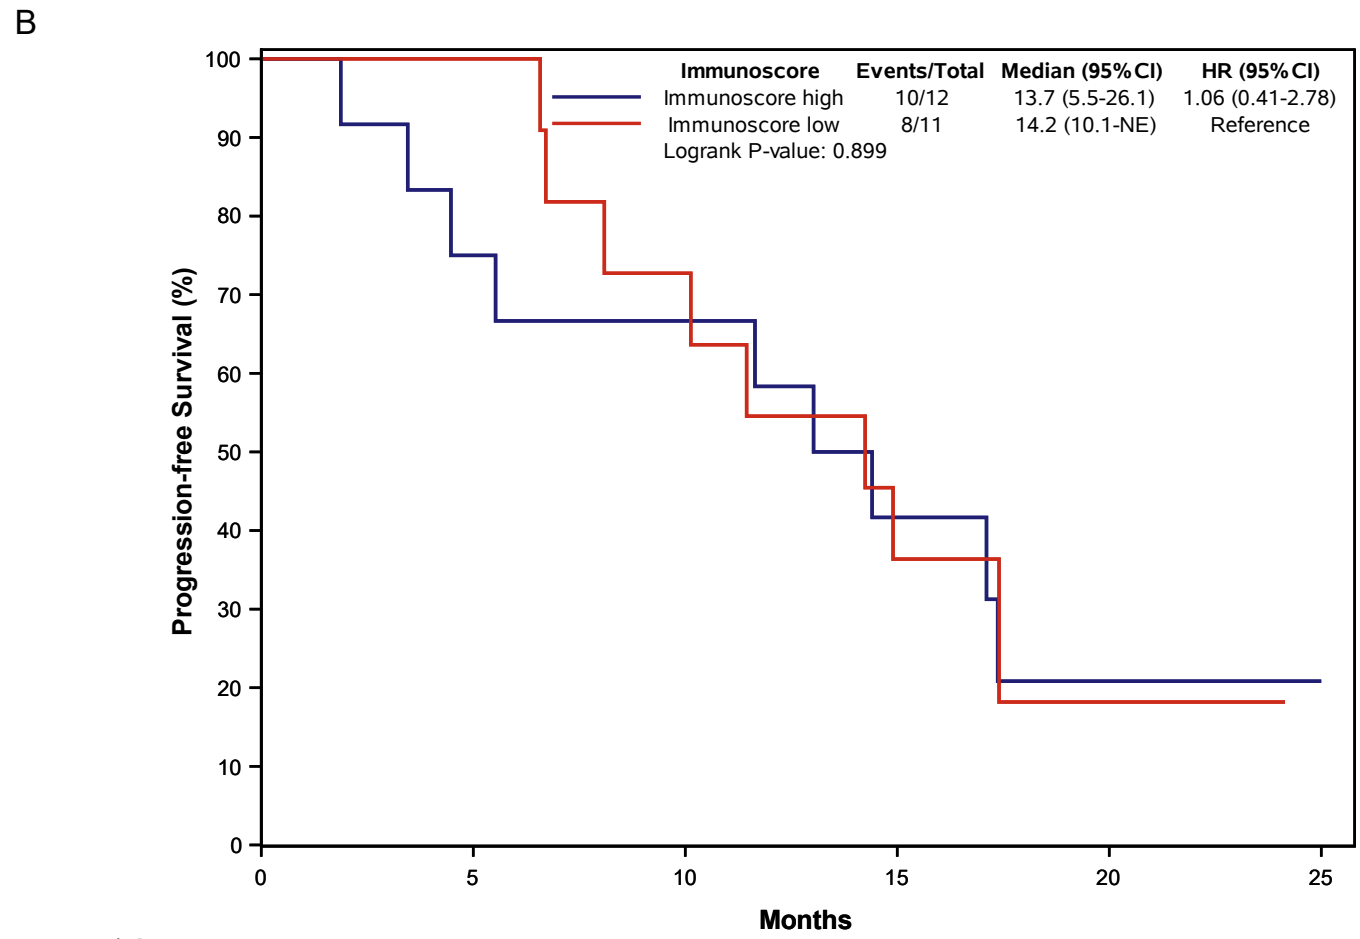

**No. at Risk**

| Months    | 0  | 5  | 10 | 15 | 20 | 25 |
|-----------|----|----|----|----|----|----|
| TILs high | 21 | 17 | 15 | 11 | 5  | 3  |
| TILs low  | 45 | 38 | 24 | 10 | 3  | 2  |

**No. at Risk**

| Months           | 0  | 5  | 10 | 15 | 20 | 25 |
|------------------|----|----|----|----|----|----|
| Immunoscore high | 12 | 9  | 8  | 5  | 1  | 1  |
| Immunoscore low  | 11 | 11 | 8  | 4  | 1  | 0  |

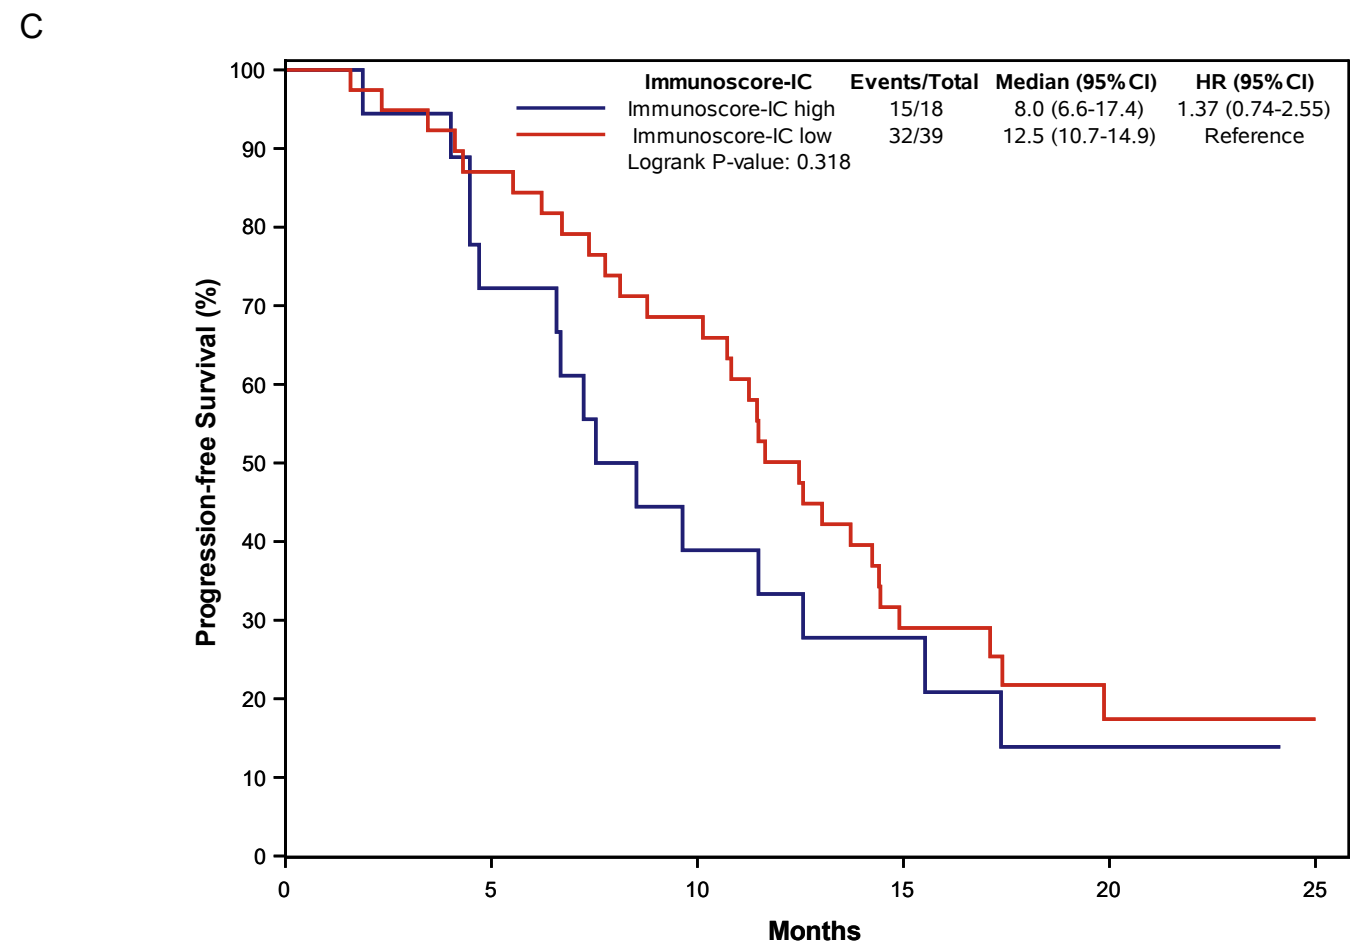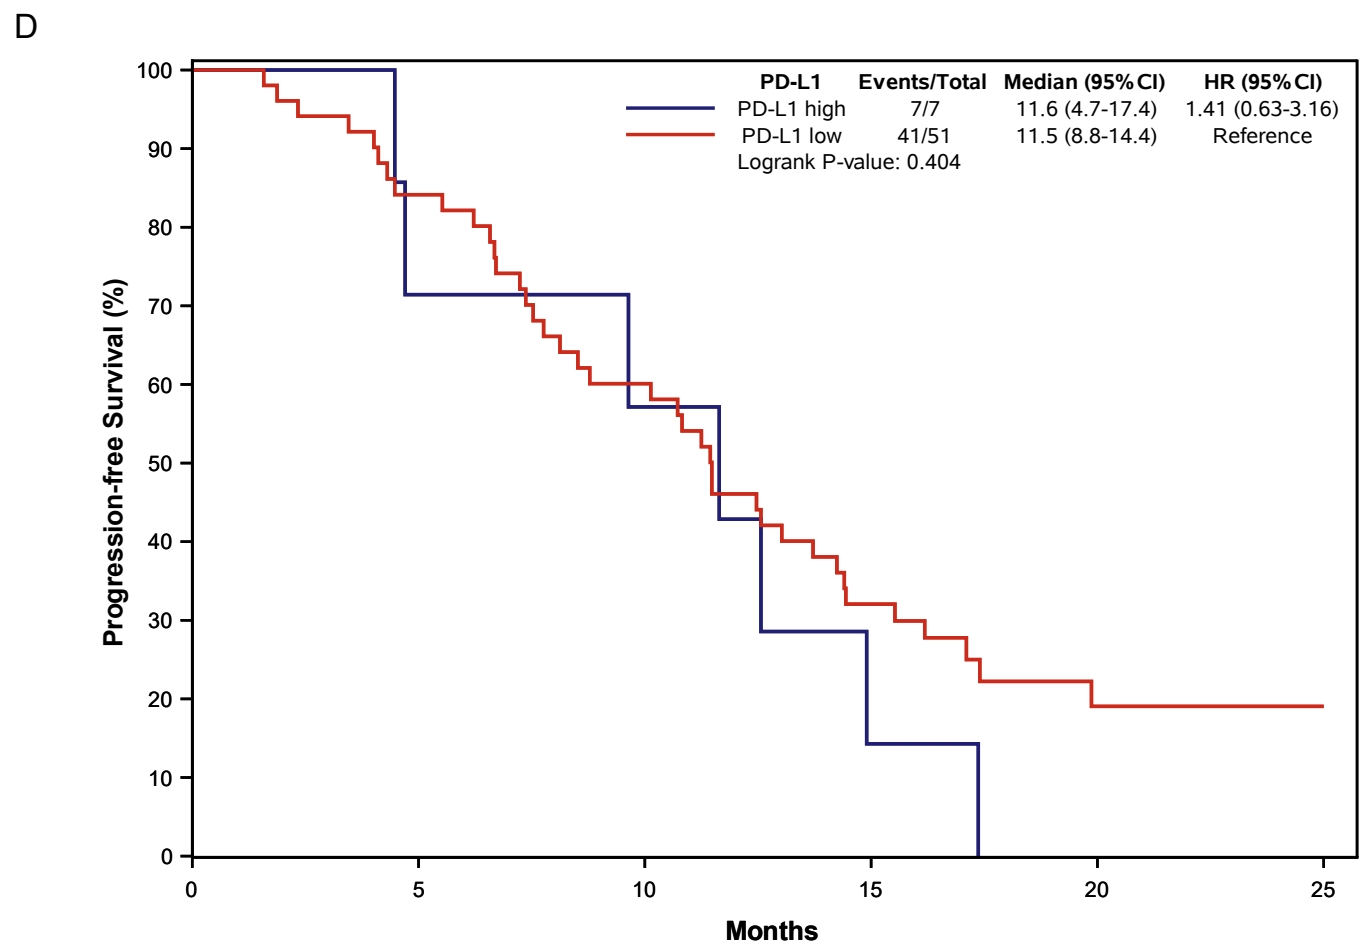

**No. at Risk**

| Months              | 0  | 5  | 10 | 15 | 20 | 25 |
|---------------------|----|----|----|----|----|----|
| Immunoscore-IC high | 18 | 13 | 7  | 5  | 2  | 0  |
| Immunoscore-IC low  | 39 | 33 | 26 | 11 | 4  | 4  |

**No. at Risk**

| Months     | 0  | 5  | 10 | 15 | 20 | 25 |
|------------|----|----|----|----|----|----|
| PD-L1 high | 7  | 5  | 4  | 1  | 0  | 4  |
| PD-L1 low  | 51 | 42 | 30 | 16 | 6  | 4  |
