# Supplementary material for: Dissecting tumor lymphocyte infiltration to predict benefit from immune-checkpoint inhibitors in metastatic colorectal cancer: lessons from the AtezoT RIBE study
Source: HighWire-hosted journal article supplement (doi:10.1136/jitc-2022-006633), 2023-04-01
Supplement: jitc-2022-006633supp006_data_supplement.pdf [file jitc-2022-006633supp006_data_supplement.pdf]

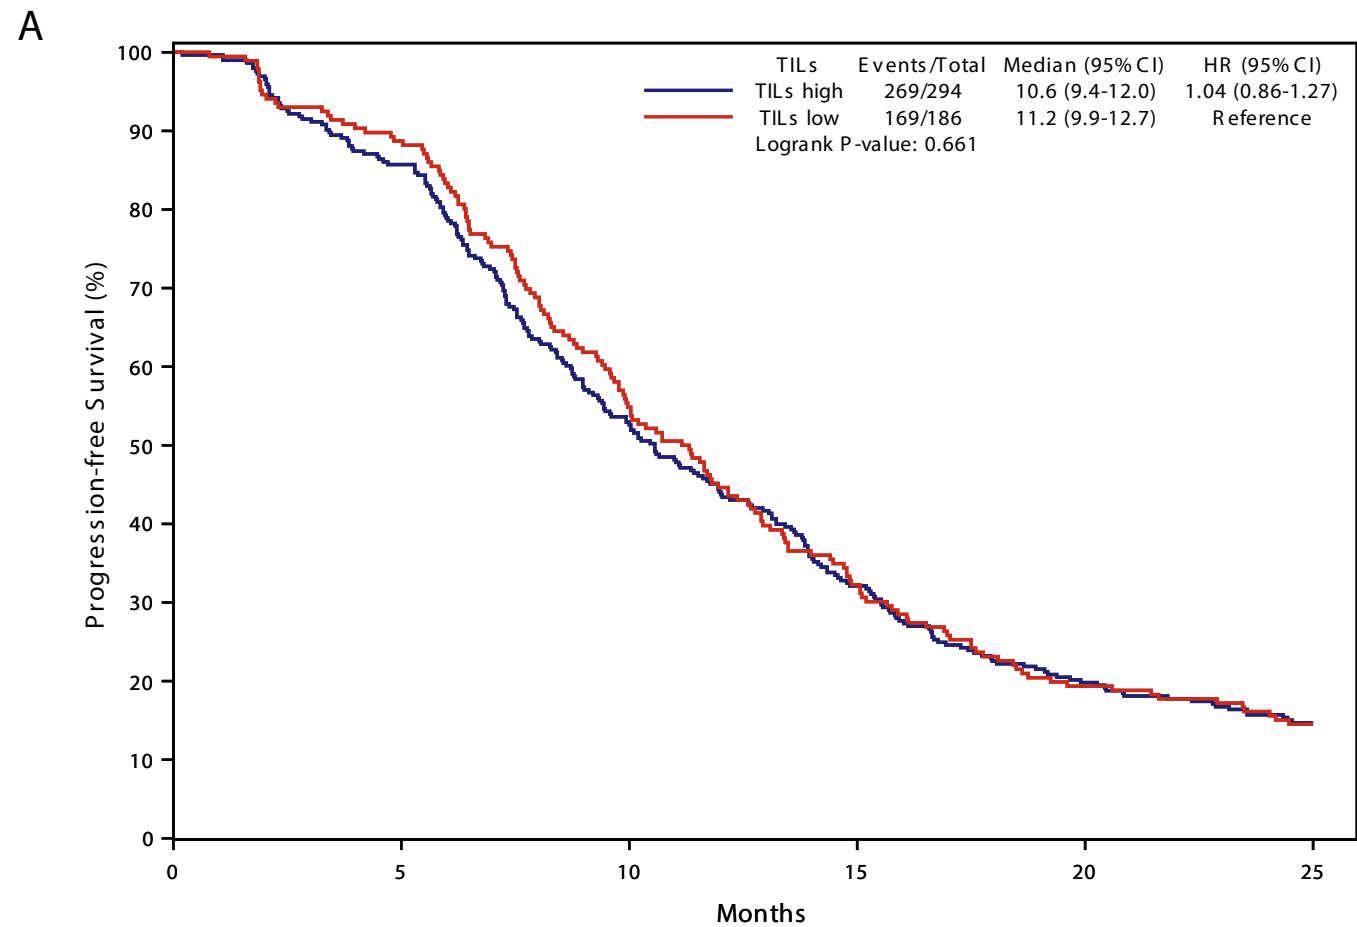

No. at Risk

| Months    | 0   | 5   | 10  | 15 | 20 | 25 |
|-----------|-----|-----|-----|----|----|----|
| TILs high | 294 | 252 | 155 | 94 | 58 | 43 |
| TILs low  | 186 | 165 | 102 | 60 | 36 | 27 |

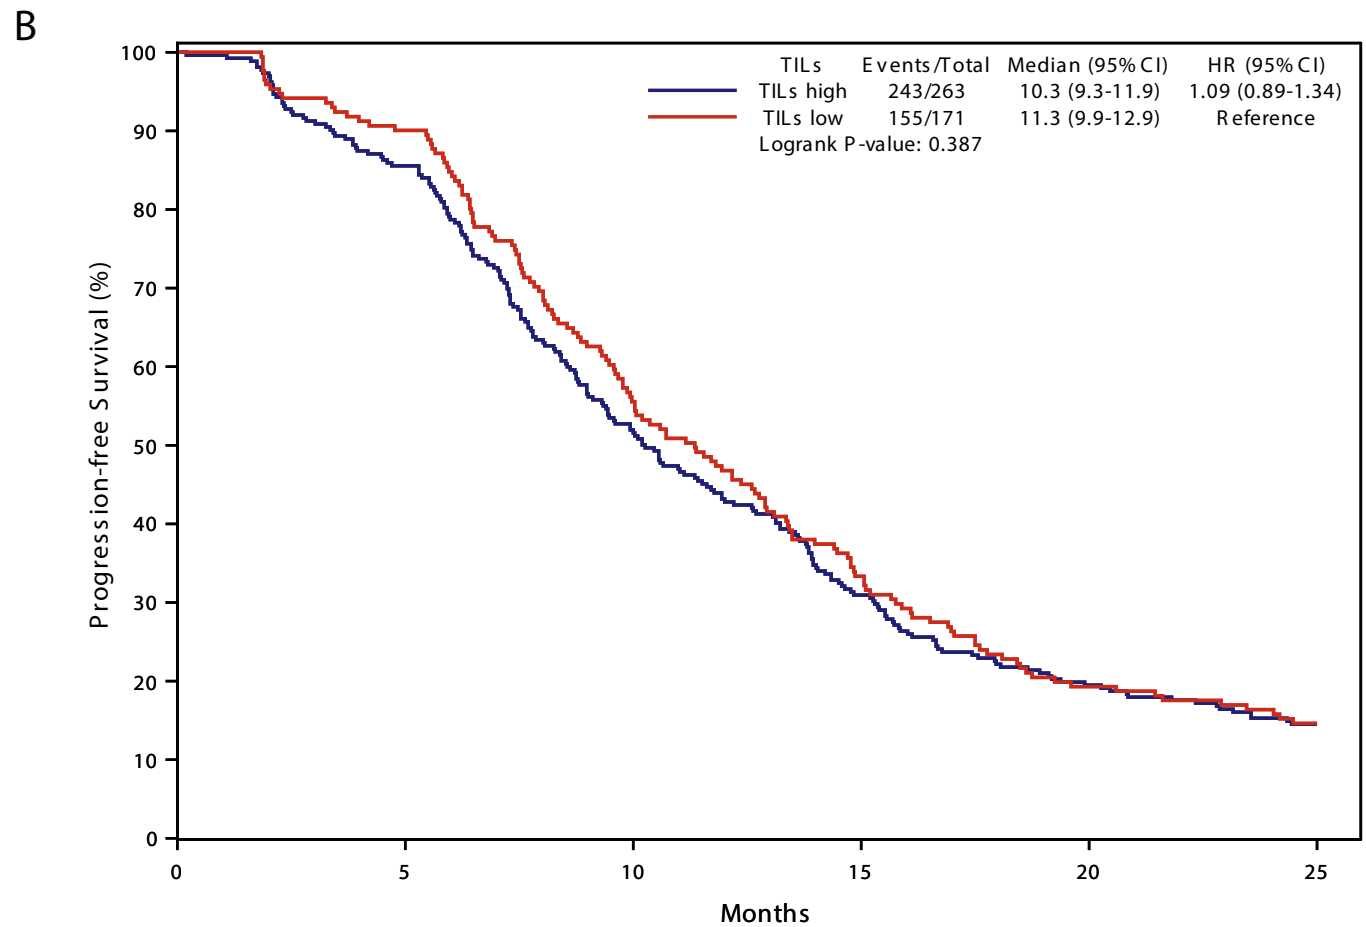

No. at Risk

| Months    | 0   | 5   | 10  | 15 | 20 | 25 |
|-----------|-----|-----|-----|----|----|----|
| TILs high | 263 | 225 | 136 | 81 | 51 | 38 |
| TILs low  | 171 | 154 | 95  | 57 | 33 | 25 |

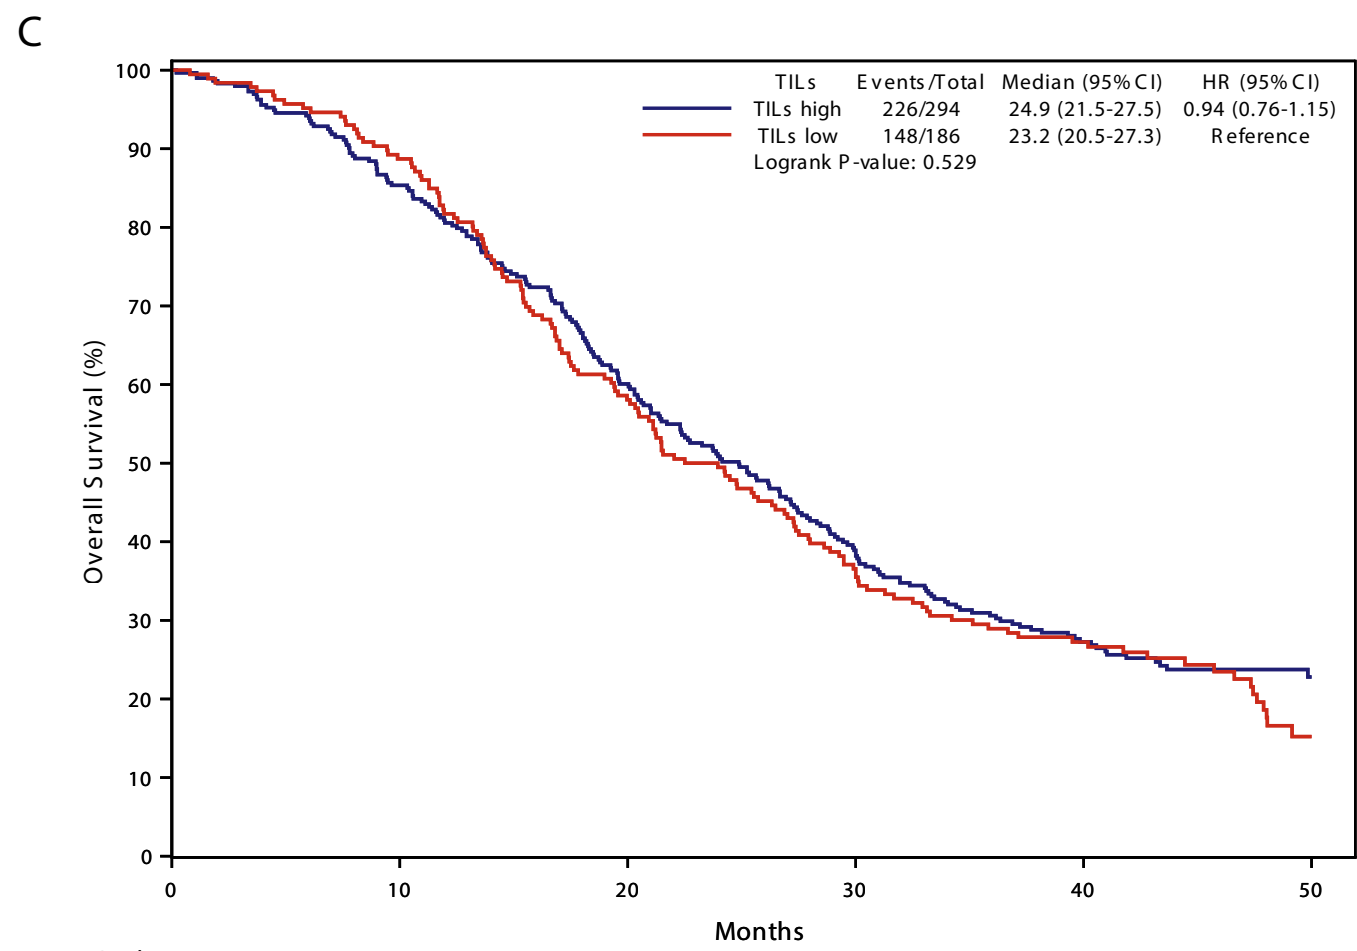

No. at Risk

| Months    | 0   | 10  | 20  | 30  | 40 | 50 |
|-----------|-----|-----|-----|-----|----|----|
| TILs high | 294 | 250 | 176 | 113 | 68 | 23 |
| TILs low  | 186 | 165 | 108 | 68  | 45 | 10 |

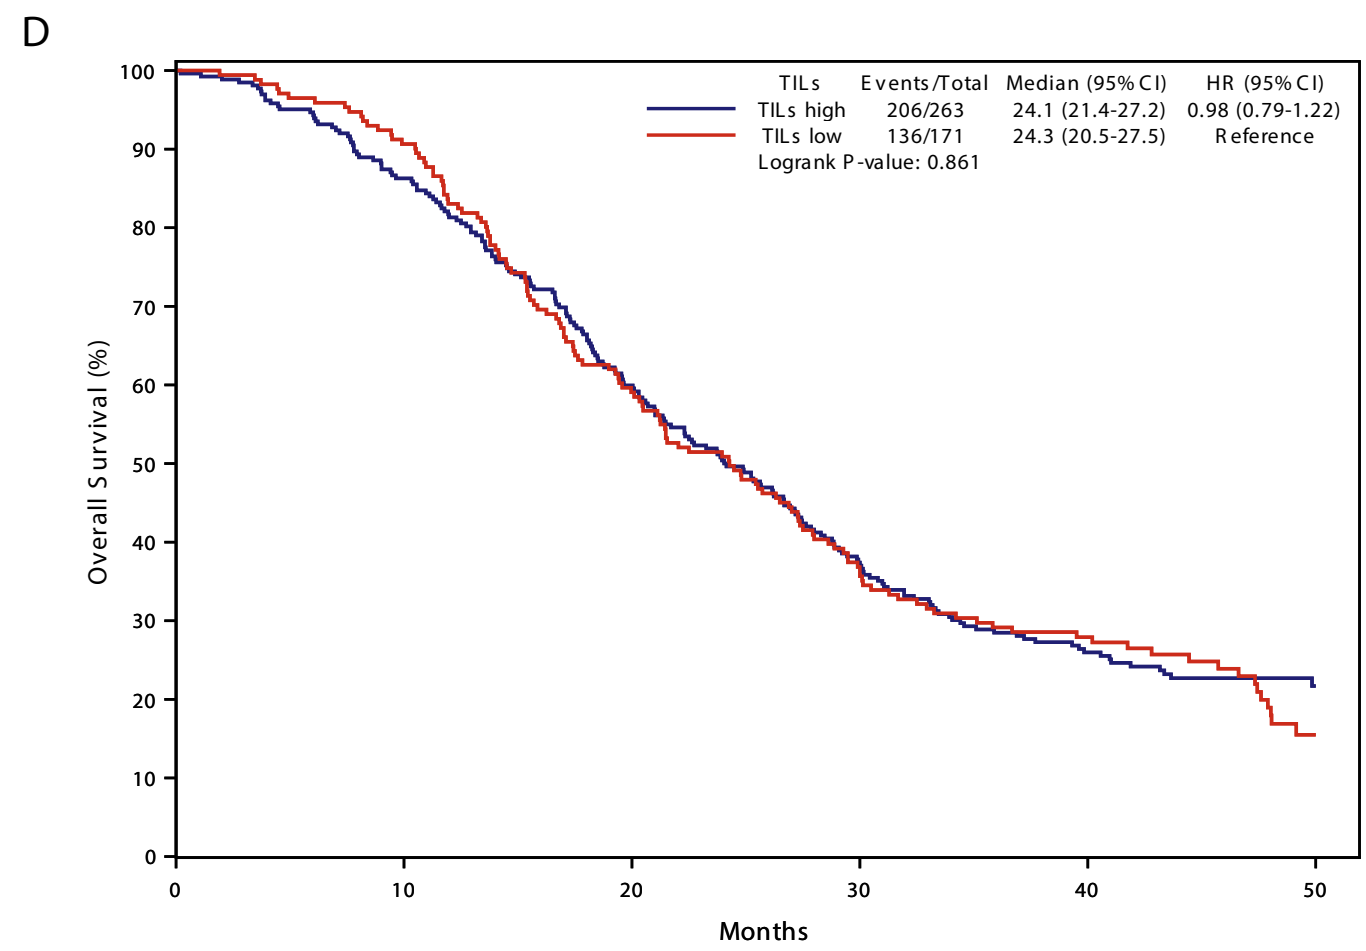

No. at Risk

| Months    | 0   | 10  | 20  | 30 | 40 | 50 |
|-----------|-----|-----|-----|----|----|----|
| TILs high | 263 | 226 | 157 | 97 | 59 | 21 |
| TILs low  | 171 | 155 | 101 | 63 | 43 | 10 |
