# Supplementary material for: Dissecting tumor lymphocyte infiltration to predict benefit from immune-checkpoint inhibitors in metastatic colorectal cancer: lessons from the AtezoT RIBE study
Source: HighWire-hosted journal article supplement (doi:10.1136/jitc-2022-006633), 2023-04-01
Supplement: jitc-2022-006633supp007_data_supplement.pdf [file jitc-2022-006633supp007_data_supplement.pdf]

**Supplementary Table 1. Technical characteristics of TILs, Immunoscore<sup>®</sup>, Immunoscore-IC<sup>®</sup> and PDL1-TPS**

| Characteristics              | TILs                                           | Immunoscore <sup>®</sup>         | Immunoscore-IC <sup>®</sup>                                                | PD-L1-TPS                                      |
|------------------------------|------------------------------------------------|----------------------------------|----------------------------------------------------------------------------|------------------------------------------------|
| <b>Pathological analysis</b> | Haematoxylin-and-eosin                         | Immunohistochemistry             | Immunohistochemistry                                                       | Immunohistochemistry                           |
| <b>Method</b>                | Optical                                        | Digital                          | Digital                                                                    | Digital                                        |
| <b>Specimens</b>             | Tumour biopsies and tumour surgical resections | Tumour surgical resections       | Tumour biopsies and tumour surgical resections                             | Tumour biopsies and tumour surgical resections |
| <b>Area</b>                  | Tumour-core                                    | Tumour-core and invasive margin  | Tumour-core                                                                | Tumour-core                                    |
| <b>Immune-markers</b>        | Density of tumour lymphocyte                   | Density of CD8+ and CD3+ T-cells | Density of CD8+ T-cells and PD-L1 cells and their proximity and clustering | Percent of PD-L1 positive tumour cells         |
