# Supplementary figures and images for: Dissecting tumor lymphocyte infiltration to predict benefit from immune-checkpoint inhibitors in metastatic colorectal cancer: lessons from the AtezoT RIBE study
Source: HighWire-hosted journal article supplement (doi:10.1136/jitc-2022-006633), 2023-04-01

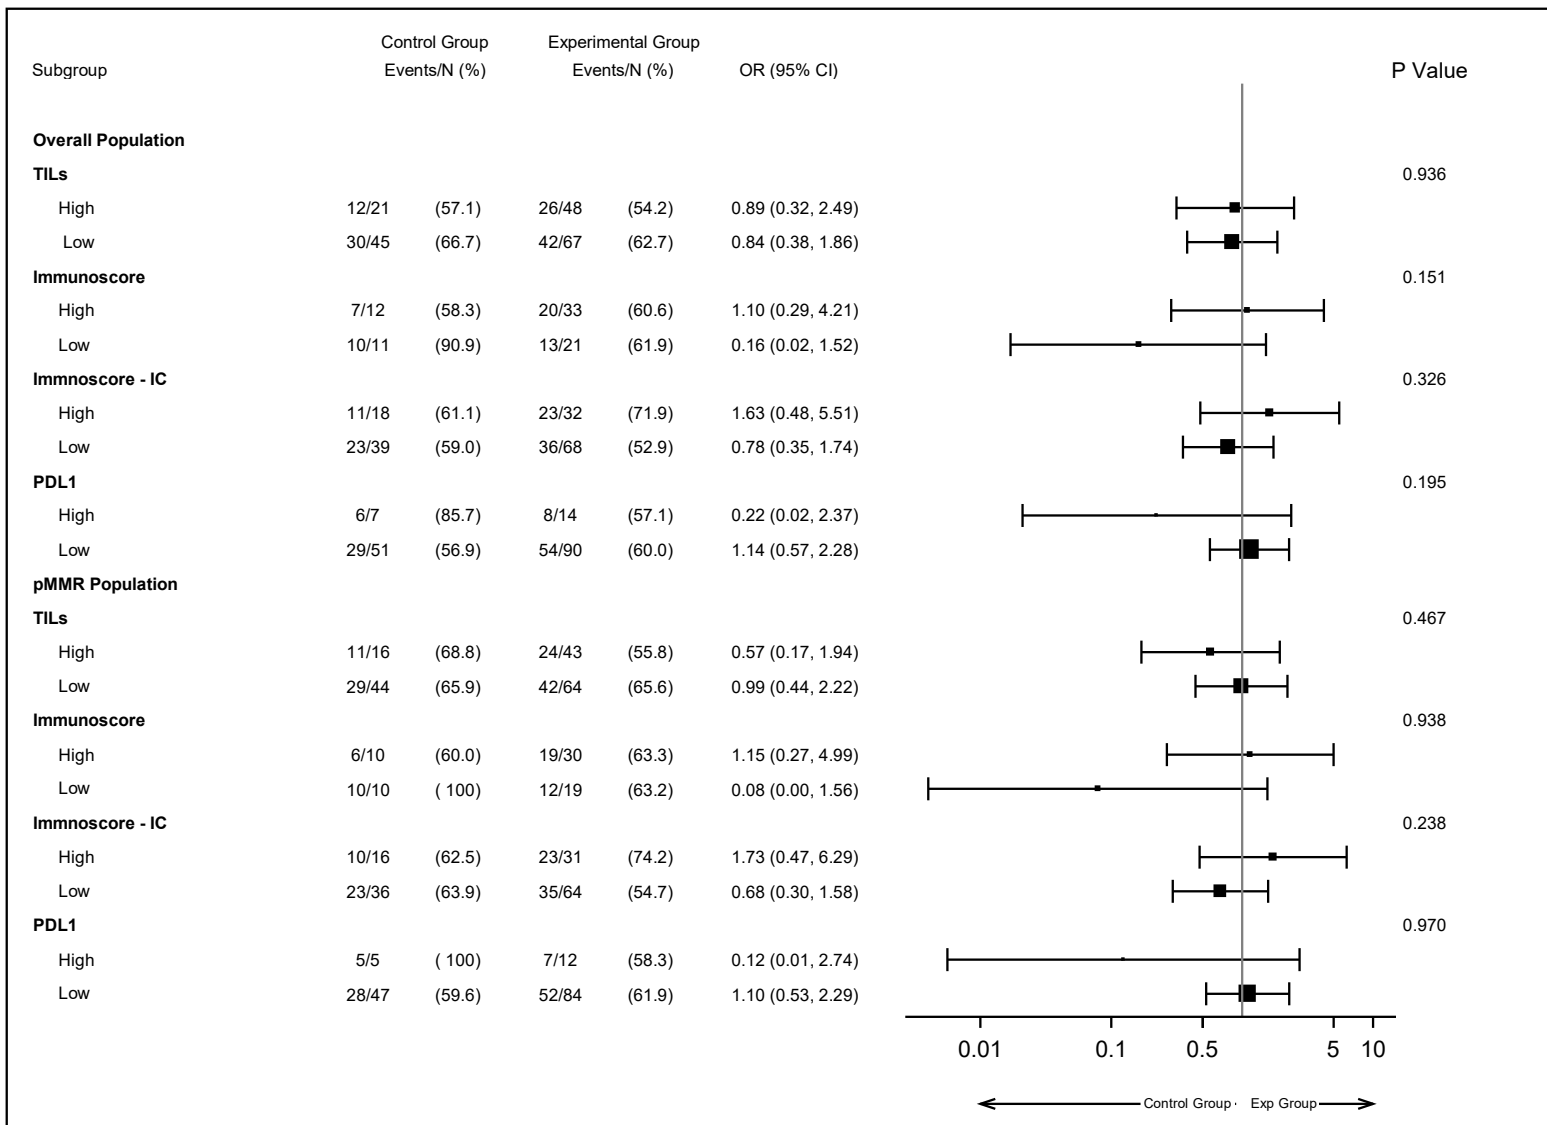

Supplement: jitc-2022-006633supp003_data_supplement.pdf [file jitc-2022-006633supp003_data_supplement.pdf]
